# Supplementary material for: Dynamic miRNA landscapes unlock sexual plasticity in protogynous orange-spotted grouper under MT-implantation
Source: Research Square preprint supplement (doi:10.21203/rs.3.rs-7094446/v1), 2025-08-05
Supplement: Supplementary file 1 [file bf707c9335dae733a442a496.pdf]

# Dynamic miRNA landscapes unlock sexual plasticity in protogynous orange-spotted grouper under MT-implantation

Leyi Chang<sup>1</sup>, Tongde Liu<sup>1</sup>, Yuhao Tao<sup>1</sup>, Yanzhao Zhao<sup>1</sup>, Tong Wang<sup>1</sup>, Xiaojing Wu<sup>2</sup>,  
Qichuang Wei<sup>1</sup>, Xi Wu<sup>1, 2\*</sup>, Xiaochun Liu<sup>1, 3\*</sup>

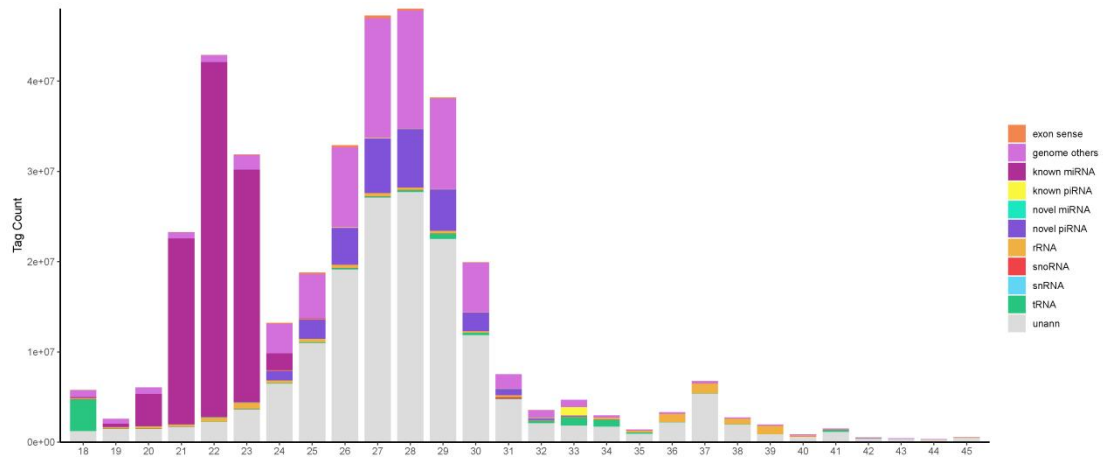

**Supplementary Figure 1. The length distribution of all obtained small RNAs.** Tag refers to the sequence of small RNAs. Tag count means the total abundance of tags. Different colours stand for different types of tags. Abbreviations: exon sense, tags aligned to genome exons, which namely were mRNA degraded fragment; genome others, tags that were aligned to genome without miRNA characteristics, including piRNA and etc.; known miRNA, miRNA aligned to the miRBase; novel miRNA, miRNA with hairpin structure that was aligned to the genome, compensating for the lack of comprehensive data within the miRBase; known piRNA: piRNA aligned to the piRBase; novel piRNA, piRNA predicted by ping-pong cycle; novel piRNA, rRNA, ribosomal RNA; snoRNA, small nucleolar RNA; snRNA, small nuclear RNA; tRNA, transfer RNA; unann, tags that did not match any annotated information.

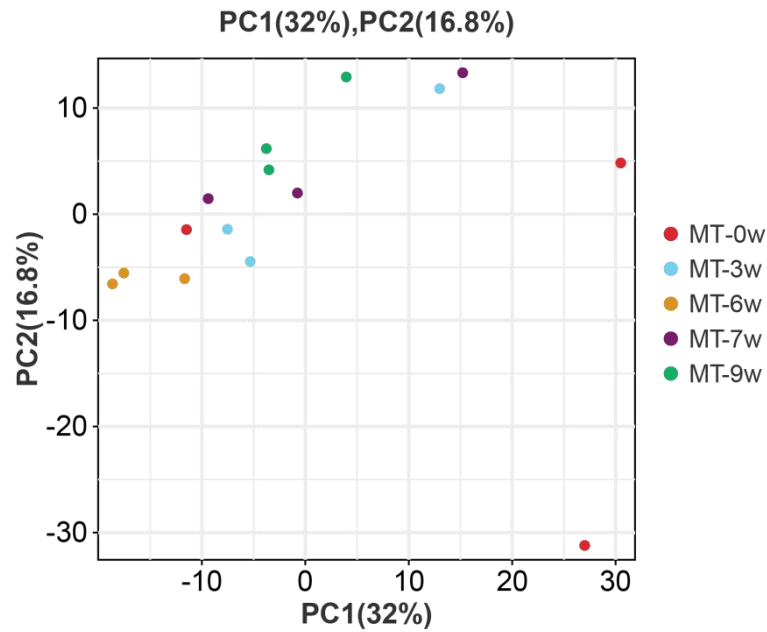

**Supplementary Figure 2. Principal component analysis of miRNA sequencing samples.** MT-0w represents the gonad samples of untreated *Epinephelus coioides* before implantation. MT-3w, MT-6w, MT-7w, and MT-9w represent gonad samples collected at 3, 6, 7, and 9 weeks after 17 $\alpha$ -methyltestosterone implantation (17 $\alpha$ -MT). n = 3 biological replicates in all groups.

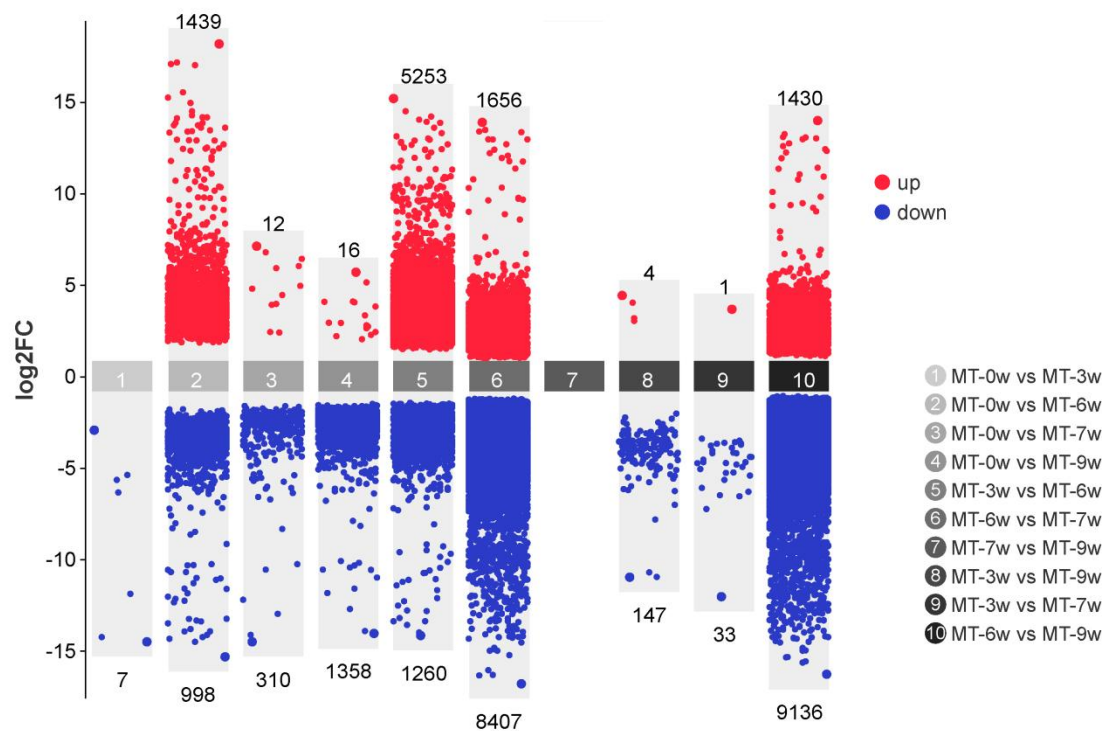

**Supplementary Figure 3. Scatter plot of DEGs across multiple groups.** In the plot, the y-axis represented the logarithm (base 2) fold change (log<sub>2</sub>FC) of inter-group differences, while the x-axis denoted the names of the comparison groups, with 1-10 representing distinct

comparison group identifiers. Scatter points positioned above the x-axis indicated up-regulated genes (in red), whereas those below the x-axis represented down-regulated genes (in blue). A fold change greater than 2 and a significance threshold of less than 0.05 were considered.

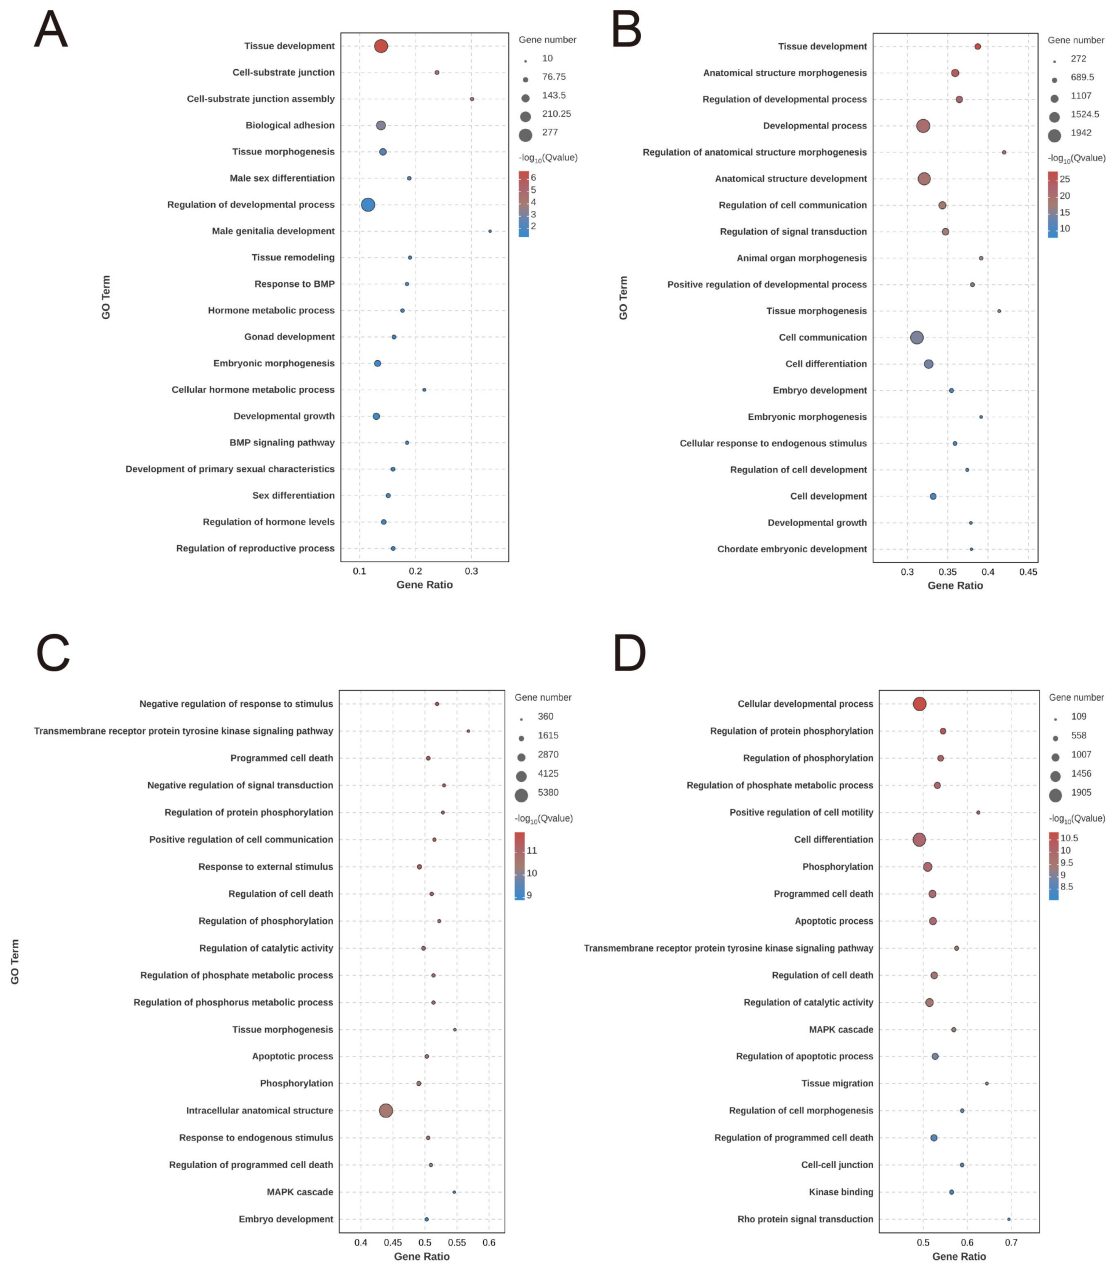

**Supplementary Figure 4. Analysis of DEGs across four groups.** (A) Top 20 enriched GO terms by DEGs in the 0 week vs 6 week. (B) Top 20 enriched GO terms by DEGs in the 3 week vs 6 week. (C) Top 20 enriched GO terms by DEGs in the 6 week vs 7 week. (D) Top 20 enriched GO terms by DEGs in the 6 week vs 9 week.

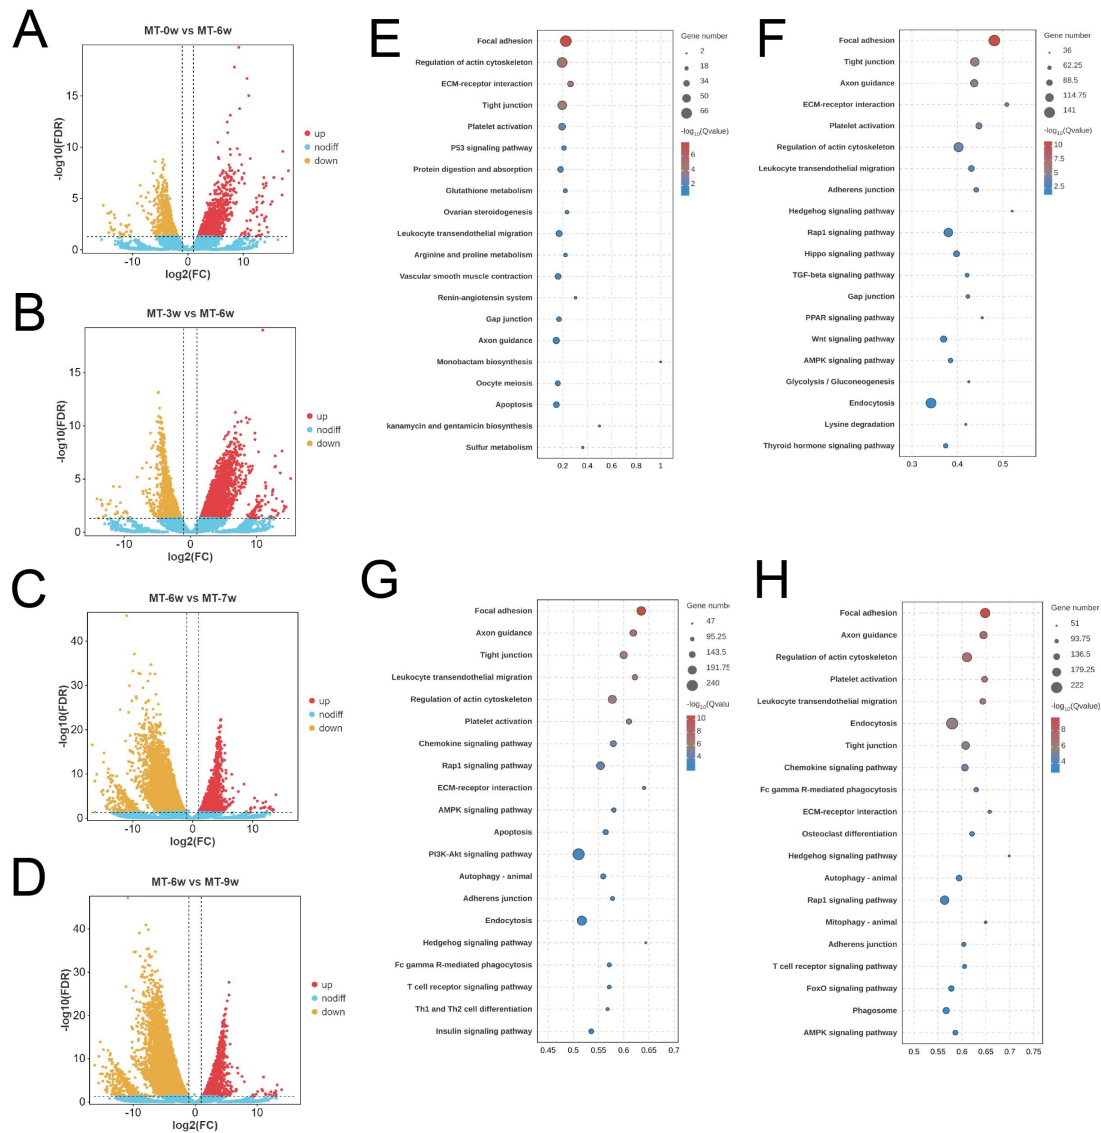

**Supplementary Figure 5. The overview of DEGs in four compare groups.** (A-D) The volcano plot displaying the level of the difference. The x-axis delineated the  $\log_2$  of the fold change ratios between the two comparative groups, with genes positioned further towards the extremities of the axis exhibiting a more significant difference. The y-axis corresponded to the  $-\log_{10}$  of the False Discovery Rate (FDR), indicative of the statistical significance of the observed differences between groups. The color-coding scheme differentiated between significantly up-regulated genes, denoted in red, down-regulated genes in yellow, and genes with no significant difference in expression, represented in blue. (E-H) Top 20 enriched KEGG terms by DEGs.

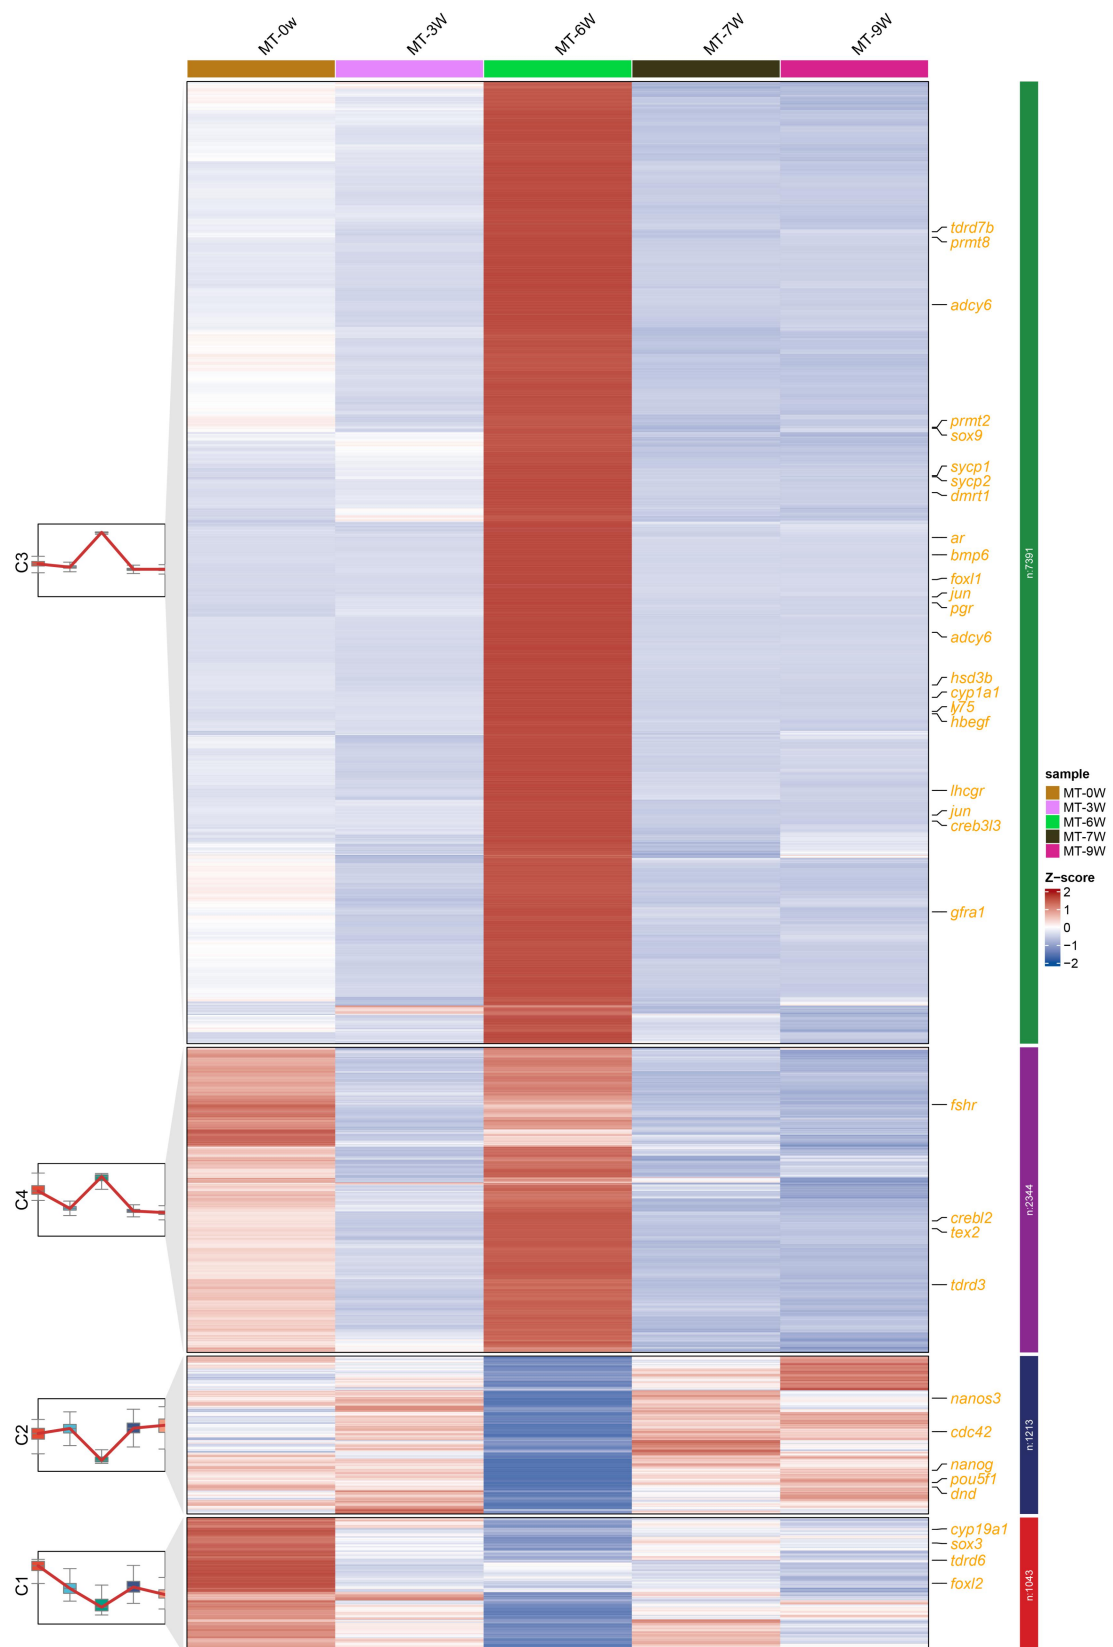

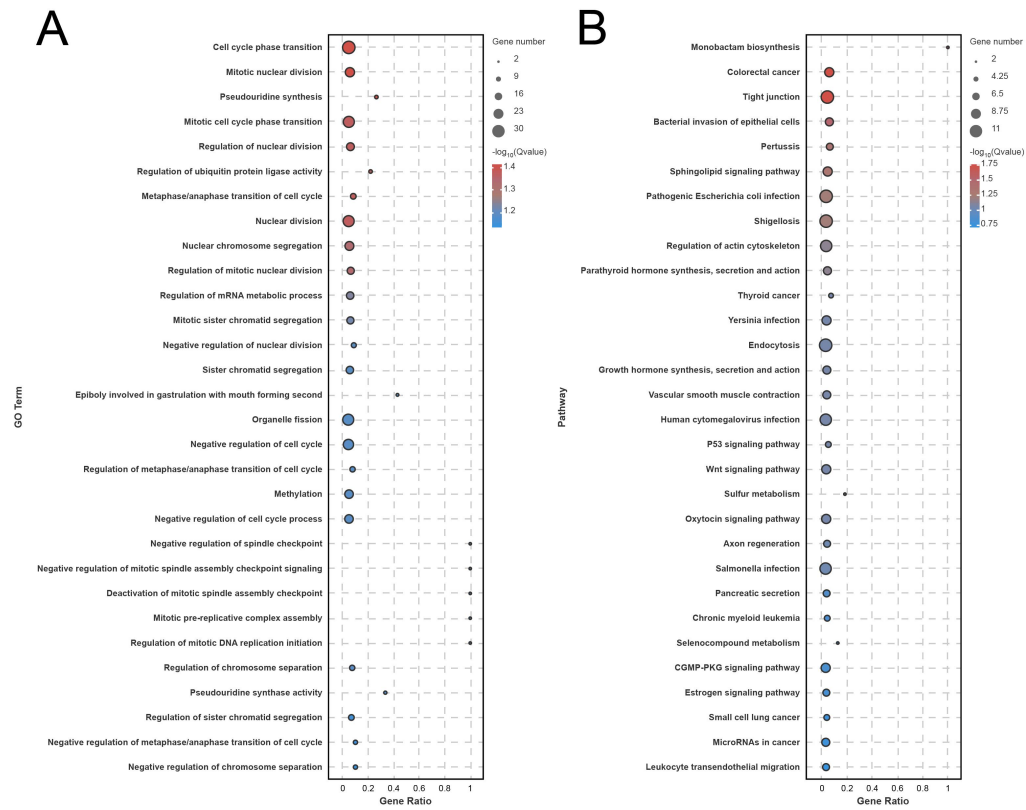

**Supplementary Figure 7. Top30 KEGG pathways of 1,145 DEGs which were up-regulated and then down-regulated and 570 DEGs that were down-regulated and then up-regulated during sex reversal.**
